# Supplementary material
Source: bioRxiv or medRxiv preprint supplement (https://www.biorxiv.org/highwire/filestream/14385/field_highwire_adjunct_files/1/052571-2.pdf)
Supplement: Supplementary file [file 052571-2.pdf]

Table S1. **Summary of FAIRE-seq data sets in all the strains in this study.** Listed are the numbers of reads mapped uniquely to strain-specific reference genome, reads filtered for pairing and PCR duplicates, and total number of reproducible FAIRE peaks identified in each strains.

| Strain   | Sample | Total read<br>x10 <sup>6</sup> | Reads<br>post filter<br>x10 <sup>6</sup> | FAIRE peak<br>identified by<br>F-seq & IDR |
|----------|--------|--------------------------------|------------------------------------------|--------------------------------------------|
| A/J      | Rep1   | 13,836,220                     | 12,331,312                               | 29,914                                     |
|          | Rep2   | 14,323,695                     | 12,159,127                               |                                            |
| AKR/J    | Rep1   | 25,120,508                     | 21,888,481                               | 29,923                                     |
|          | Rep2   | 27,067,431                     | 23,766,117                               |                                            |
| BALB/cJ  | Rep1   | 19,185,543                     | 12,556,928                               | 30,077                                     |
|          | Rep2   | 20,374,839                     | 13,877,891                               |                                            |
| C57BL/6J | Rep1   | 22,484,699                     | 20,942,285                               | 30,598                                     |
|          | Rep2   | 24,519,376                     | 23,343,598                               |                                            |
| C3H/HeJ  | Rep1   | 20,400,719                     | 12,830,230                               | 30,370                                     |
|          | Rep2   | 25,350,052                     | 18,635,238                               |                                            |
| CBA/J    | Rep1   | 23,497,233                     | 20,541,717                               | 30,613                                     |
|          | Rep2   | 22,170,236                     | 18,426,726                               |                                            |
| DBA/2J   | Rep1   | 16,778,315                     | 15,883,801                               | 26,769                                     |
|          | Rep2   | 20,831,992                     | 19,808,014                               |                                            |
| Average  |        | 21,138,633                     | 17,642,248                               | 29,752                                     |
